# Supplementary material
Source: Springer Nature journal article supplement (https://www.springermedizin.de/resource/supplementary/12974_2011_457_MOESM2_ESM.pdf/9601354)

A

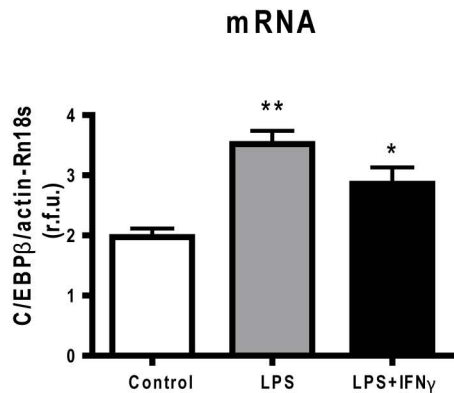

B

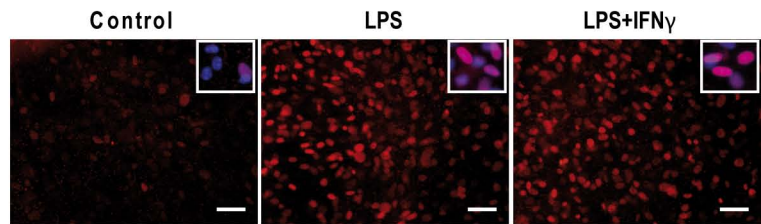

C

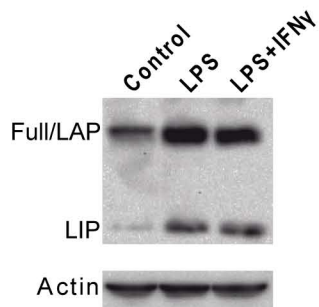

D

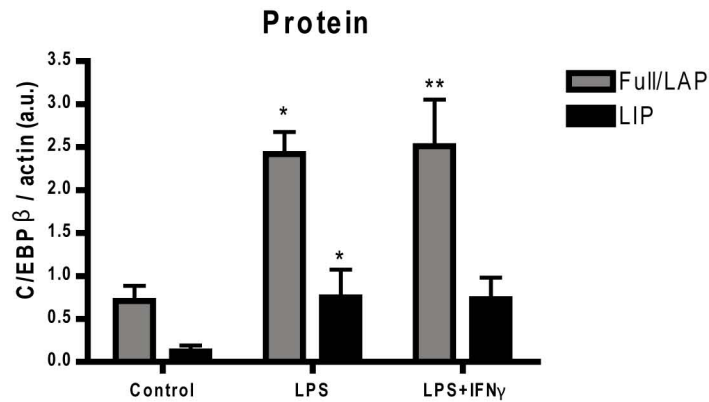

Supplement: MOESM2 [file 9601354]
